# Supplementary material for: CAD Drives Colorectal Cancer Progression through the JAK2/STAT1 Pathway and Correlates with Poor Prognosis
Source: Research Square preprint supplement (doi:10.21203/rs.3.rs-8240821/v1), 2025-12-30
Supplement: Supplementary file 1 [file a7dd2558bb60ad23cf073d46.docx]

| Variables | Total(n= 121) | CAD immunostaining score  Low(n = 47) High(n=74) | | χ² | *P* value |
| --- | --- | --- | --- | --- | --- |
| Gender, n(%) |  |  |  | 0.27 | 0.605 |
| Female | 48 (39.67) | 28 (37.84) | 20 (42.55) |  |  |
| Male | 73 (60.33) | 46 (62.16) | 27 (57.45) |  |  |
| Age, n(%) |  |  |  | 3.02 | 0.082 |
| >60 y | 55 (45.45) | 29 (39.19) | 26 (55.32) |  |  |
| ≤60 y | 66 (54.55) | 45 (60.81) | 21 (44.68) |  |  |
| BMI, n(%) |  |  |  | 0.251 | 0.526 |
| >28 kg/m2 | 11 (9.09) | 8 (10.81) | 3 (6.38) |  |  |
| ≤28 kg/m2 | 110 (90.91) | 66 (89.19) | 44 (93.62) |  |  |
| T, n(%) |  |  |  | 0.06 | 0.809 |
| T1-T2 | 32 (26.45) | 19 (25.68) | 13 (27.66) |  |  |
| T3-T4 | 89 (73.55) | 55 (74.32) | 34 (72.34) |  |  |
| N, n(%) |  |  |  | 0.09 | 0.760 |
| N0 | 70 (57.85) | 42 (56.76) | 28 (59.57) |  |  |
| N1-N2 | 51 (42.15) | 32 (43.24) | 19 (40.43) |  |  |
| M, n(%) |  |  |  | 0.389 | 0.533 |
| M0 | 114 (94.21) | 71 (95.95) | 43 (91.49) |  |  |
| M1 | 7 (5.79) | 3 (4.05) | 4 (8.51) |  |  |
| Stage, n(%) |  |  |  | 0.20 | 0.652 |
| Ⅰ-Ⅱ | 69 (57.02) | 41 (55.41) | 28 (59.57) |  |  |
| Ⅲ-Ⅳ | 52 (42.98) | 33 (44.59) | 19 (40.43) |  |  |
| Tumor Budding, n(%) |  |  |  | 7.34 | 0.025 |
| Grande 1 | 74 (61.16) | 52 (70.27) | 22 (46.81) |  |  |
| Grande 2 | 20 (16.53) | 8 (10.81) | 12 (25.53) |  |  |
| Grande 3 | 27 (22.31) | 14 (18.92) | 13 (27.66) |  |  |
| Mismatch Repair, n(%) |  |  |  | 4.94 | 0.026 |
| dMMR | 35 (28.93) | 16 (21.62) | 19 (40.43) |  |  |
| pMMR | 86 (71.07) | 58 (78.38) | 28 (59.57) |  |  |
| CA199, n(%) |  |  |  | 3.14 | 0.076 |
| >100 U/mL | 10 (8.26) | 3 (4.05) | 7 (14.89) |  |  |
| ≤100 U/mL | 111 (91.74) | 71 (95.95) | 40 (85.11) |  |  |
| CEA, n(%) |  |  |  | 0.00 | 0.997 |
| >20 ng/mL | 18 (14.88) | 11 (14.86) | 7 (14.89) |  |  |
| ≤20 ng/mL | 103 (85.12) | 63 (85.14) | 40 (85.11) |  |  |
|  | | | | | |
|  | | | | | |
